# Supplementary material for: Discrete half-sandwich Ir, Rh-based organometallic molecular boxes: synthesis, characterization, and their properties
Source: Royal Society of Chemistry journal article supplement (doi:10.1039/c1dt10506j), 2011-01-01
Supplement: c1dt10506j.pdf [file c1dt10506j.pdf]

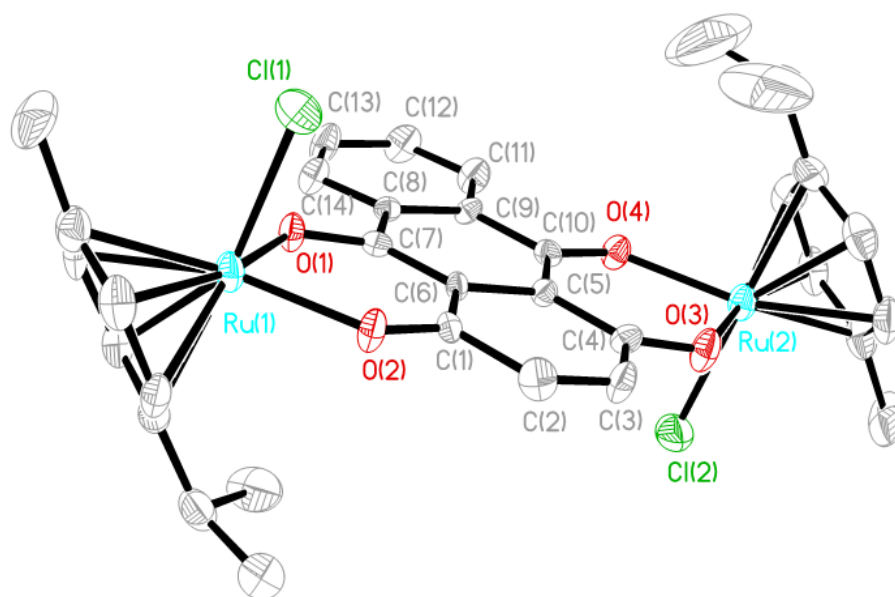

**Fig.S1** ORTEP view of the molecular structure of complex **2c** with thermal ellipsoids drawn at the 30% level. Hydrogen atoms are omitted for clarity. Selected distances (Å) and angles (°): Ru(1)-O(1) 2.030(4), Ru(1)-O(2) 2.063(4), Ru(2)-O(3) 2.032(4), Ru(2)-O(4) 2.050(4), Ru(1)-Cl(1) 2.410(2), Ru(2)-Cl(2) 2.404(2), O(1)-C(7) 1.302(6), O(2)-C(1) 1.286(7), O(3)-C(4) 1.283(7), O(4)-C(10) 1.284(6), C(2)-C(3) 1.339(8); O(1)-Ru(1)-O(2) 85.69(16), O(3)-Ru(2)-O(4) 85.48(17), O(1)-Ru(1)-Cl(1) 85.73(13), O(2)-Ru(1)-Cl(1) 84.40(13). Symmetry transformations used to generate equivalent atoms:  $3/2-x$ ,  $1/2-y$ ,  $z$ .

**Table S1** Crystallographic Data for Ru-complex

|                                               | Ru-complex                                                                     |
|-----------------------------------------------|--------------------------------------------------------------------------------|
| Empirical formula                             | C <sub>34</sub> H <sub>34</sub> Cl <sub>2</sub> O <sub>4</sub> Ru <sub>2</sub> |
| Formula weight                                | 779.65                                                                         |
| Crystal size (mm <sup>3</sup> )               | 0.12 x 0.10 x 0.08                                                             |
| Crystal system, Space group                   | Monoclinic <i>C2/c</i>                                                         |
| a (Å)                                         | 39.475(15)                                                                     |
| b (Å)                                         | 7.891(3)                                                                       |
| c (Å)                                         | 19.526(7)                                                                      |
| $\alpha$ (deg)                                | 90                                                                             |
| $\beta$ (deg)                                 | 92.223(6)                                                                      |
| $\gamma$ (deg)                                | 90                                                                             |
| V (Å <sup>3</sup> )                           | 6078(4)                                                                        |
| Z, $\rho_{\text{calcd}}$ (g/cm <sup>3</sup> ) | 8, 1.704                                                                       |
| $\mu$ (Mo K $\alpha$ )(mm <sup>-1</sup> )     | 1.208                                                                          |
| Limiting indices                              | -46 $\leq$ h $\leq$ 44,<br>-9 $\leq$ k $\leq$ 9,<br>-23 $\leq$ l $\leq$ 20     |
| Reflections collected / unique                | 12066 / 5328 [R(int) = 0.0800]                                                 |
| Data / restraints / parameters                | 5328 / 0 / 385                                                                 |
| Goodness of fit                               | 0.658                                                                          |
| $R_1$ , $wR_2$ [ $I > 2\sigma(I)$ ]           | $R_1 = 0.0424$ , $wR_2 = 0.0712$                                               |
| $R_1$ , $wR_2$ (all data)                     | $R_1 = 0.1063$ , $wR_2 = 0.0789$                                               |
| Max/min residual density (eÅ <sup>-3</sup> )  | 0.650 and -0.577                                                               |

CCDC No. 818216 contains the supplementary crystallographic data for Ru-complex.

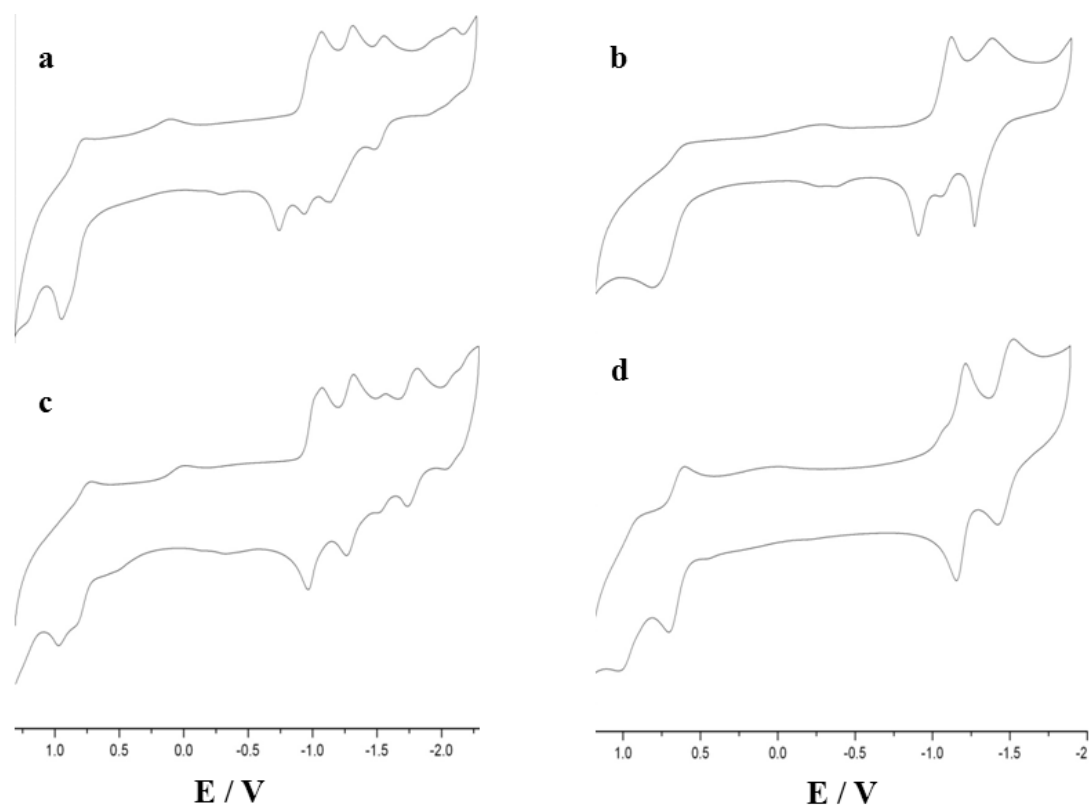

**Fig.S2** Cyclic voltammograms of (a) **4a**, (b) **4b**, (c) **5a** and (d) **5b** in  $\text{CH}_2\text{Cl}_2/0.1 \text{ M}$   $(\text{n-Bu})_4\text{NPF}_6$  with a scan rate of 100 mV/s versus  $\text{Fc}^+/\text{Fc}$  (ferrocinium/ferrocene) at 298 K.
